# Supplementary material for: Genome-wide analysis of self-reported risk-taking behaviour and cross-disorder genetic correlations in the UK Biobank cohort
Source: PubMed Central journal article supplement (PMC5804026; doi:10.1038/s41398-017-0079-1), 2018-02-02

# Supplimentary Figure 5

A)

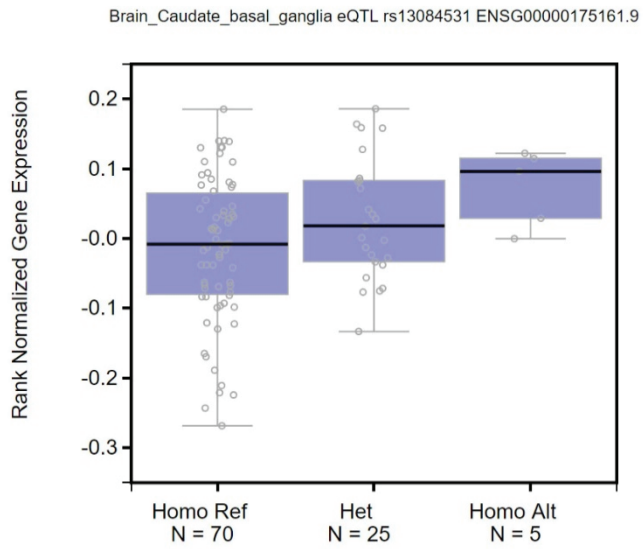

B)

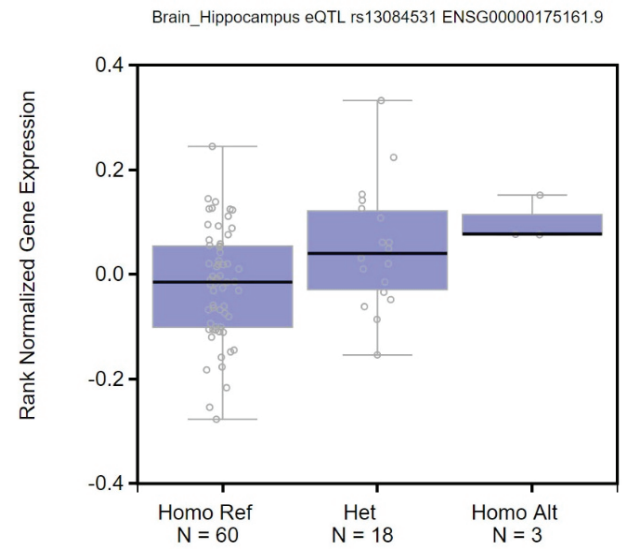

C)

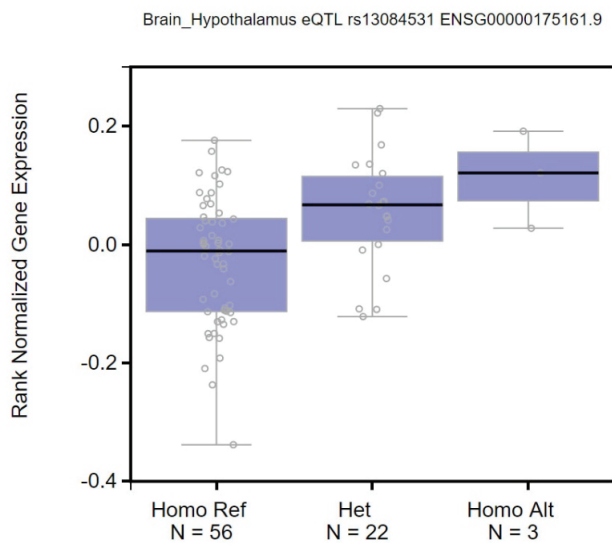

D)

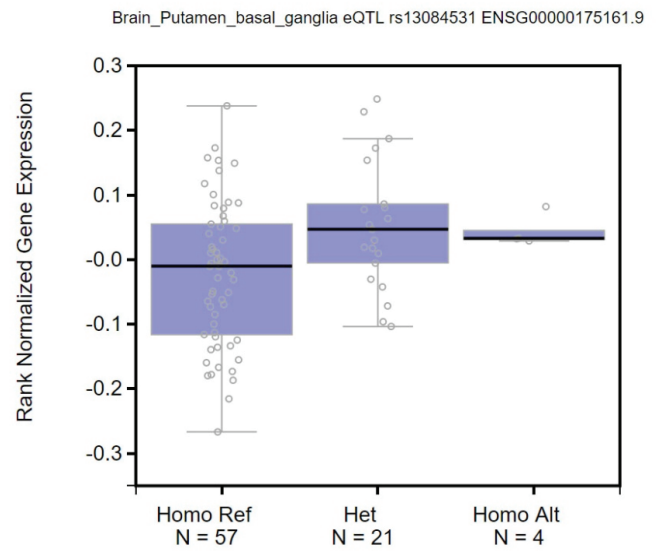

Supplement: 41398_2017_79_MOESM16_ESM.pdf [file 41398_2017_79_MOESM16_ESM.pdf]
